## Eligibility for thrombolysis and outcome in pediatric acute ischemic stroke

Romain C. Briest FRACP<sup>1,\*</sup>, Kartik D Bhatia FRANZCR<sup>2</sup>, Christina Miteff FRACP<sup>3</sup>, Andrew Cheung FRANZCR<sup>4</sup>, Jayne Antony FRACP<sup>5</sup>, Simone Ardern-Holmes FRACP<sup>5</sup>, Annie Bye FRACP<sup>1</sup>, Michael Cardamone FRACP<sup>1</sup>, Denise Chan FRACP<sup>1</sup>, Russell Dale FRACP<sup>5</sup>, Michelle Farrar FRACP<sup>1</sup>, Deepak Gill FRACP<sup>5</sup>, Sachin Gupta FRACP<sup>5</sup>, Alexandra Johnson FRACP<sup>1</sup>, Tejaswi Kandula FRACP<sup>1</sup>, John Lawson FRACP<sup>1</sup>, Nathan Manning FRANZCR<sup>4</sup>, Karlee McCann RN<sup>1,5</sup>, Alexander McQuinn FRANZCR<sup>4</sup>, Manoj P Menezes FRACP<sup>5</sup>, Ferdinand Miteff FRACP<sup>3</sup>, Sekhar Pillai FRACP<sup>1</sup>, Hugo Sampaio FRACP<sup>1</sup>, Robert L Smith FRACP<sup>3</sup>, Gopinath M Subramanian<sup>3</sup>, Hooi Ling Teoh FRACP<sup>1</sup>, Christopher Troedson FRACP<sup>5</sup>, Richard Webster FRACP<sup>5</sup>, Jason Wenderoth FRANZCR<sup>4</sup>, Justin Whitley FRANZCR<sup>4</sup> P. Ian Andrews FRACP<sup>1</sup>

<sup>1</sup> Department of Neurology, Sydney Children's Hospital, Randwick, NSW, Australia

<sup>2</sup> Department of Medical Imaging, Children's Hospital at Westmead, Westmead, NSW, Australia

<sup>3</sup> Department of Neurology, John Hunter Children's Hospital, Newcastle, NSW, Australia

<sup>4</sup> Department of Neurointervention, Prince of Wales Hospital, Randwick, NSW, Australia

<sup>5</sup> T.Y. Nelson Department of Neurology and Neurosurgery, Children's Hospital at Westmead, Westmead, NSW, Australia

**The authors have withdrawn this manuscript because the manuscript has undergone considerable revision, such that this manuscript does not represent the data or interpretation as intended. Therefore, the authors do not wish this work to be cited as reference for the project. If you have any questions, please contact the corresponding author.**
